# Supplementary material for: Improving Time to Independent Oral Feeding to Expedite Hospital Discharge in Preterm Infants
Source: Oxford University Press journal article supplement (doi:10.1542/peds.2021-052023), 2022-02-25
Supplement: peds_2021052023supplementarydata.pdf [file peds_2021052023supplementarydata.pdf]

# Supplemental Information

## WEEKLY ORAL FEEDING LOG

Name: \_\_\_\_\_ medical record number: \_\_\_\_\_ Start date: \_\_\_\_\_ GA: \_\_\_\_\_ PMA: \_\_\_\_\_

|           |   | Pre-feeding Assessment |                           |                    | Oral Feeding Assessment           |                       |                      |
|-----------|---|------------------------|---------------------------|--------------------|-----------------------------------|-----------------------|----------------------|
|           |   | <4L HFNC?              | Normal work of breathing? | Responsive to care | Suck-swallow-breathe coordination | Interventions applied | Feeding discontinued |
| MONDAY    | 1 |                        |                           |                    | Adequate Fair Weak                |                       |                      |
|           | 2 |                        |                           |                    | Adequate Fair Weak                |                       |                      |
|           | 3 |                        |                           |                    | Adequate Fair Weak                |                       |                      |
|           | 4 |                        |                           |                    | Adequate Fair Weak                |                       |                      |
|           | 5 |                        |                           |                    | Adequate Fair Weak                |                       |                      |
|           | 6 |                        |                           |                    | Adequate Fair Weak                |                       |                      |
|           | 7 |                        |                           |                    | Adequate Fair Weak                |                       |                      |
|           | 8 |                        |                           |                    | Adequate Fair Weak                |                       |                      |
| TUESDAY   | 1 |                        |                           |                    | Adequate Fair Weak                |                       |                      |
|           | 2 |                        |                           |                    | Adequate Fair Weak                |                       |                      |
|           | 3 |                        |                           |                    | Adequate Fair Weak                |                       |                      |
|           | 4 |                        |                           |                    | Adequate Fair Weak                |                       |                      |
|           | 5 |                        |                           |                    | Adequate Fair Weak                |                       |                      |
|           | 6 |                        |                           |                    | Adequate Fair Weak                |                       |                      |
|           | 7 |                        |                           |                    | Adequate Fair Weak                |                       |                      |
|           | 8 |                        |                           |                    | Adequate Fair Weak                |                       |                      |
| WEDNESDAY | 1 |                        |                           |                    | Adequate Fair Weak                |                       |                      |
|           | 2 |                        |                           |                    | Adequate Fair Weak                |                       |                      |
|           | 3 |                        |                           |                    | Adequate Fair Weak                |                       |                      |
|           | 4 |                        |                           |                    | Adequate Fair Weak                |                       |                      |
|           | 5 |                        |                           |                    | Adequate Fair Weak                |                       |                      |
|           | 6 |                        |                           |                    | Adequate Fair Weak                |                       |                      |
|           | 7 |                        |                           |                    | Adequate Fair Weak                |                       |                      |
|           | 8 |                        |                           |                    | Adequate Fair Weak                |                       |                      |

| Suck-Swallow-Breathe |                                                                                                                                                                                                                      | Feeding Interventions |                                                          | Discontinuation of Feeding |                                                 |
|----------------------|----------------------------------------------------------------------------------------------------------------------------------------------------------------------------------------------------------------------|-----------------------|----------------------------------------------------------|----------------------------|-------------------------------------------------|
| Adequate             | Engaged with rhythmical and coordinated sucking<br>No oral spill<br>No intervention required                                                                                                                         | A                     | Elevated side-lying position                             | A                          | Fatigue                                         |
| Fair                 | Initially engaged but fatigues as feeding progresses<br>Difficulty coordinating swallow<br>Responded to pacing for oral spill<br>May benefit from rest breaks<br>Slight increase in work of breathing above baseline | B                     | External pacing                                          | B                          | Behavioral stress cues                          |
|                      |                                                                                                                                                                                                                      | C                     | Increased oxygen need during feeding                     | C                          | Disengagement cues and/or avoidance             |
|                      |                                                                                                                                                                                                                      | D                     | Nipple change                                            | D                          | Feeding exceeds 30 minutes                      |
|                      |                                                                                                                                                                                                                      | E                     | Stimulation due to bradycardia(s) and/or desaturation(s) | E                          | Frequent bradycardias and desaturations         |
| Weak                 | Becomes disengaged related to stress cues<br>Experienced bradycardia(s) and/or desaturation(s)<br>Significant oral spill<br>Heavy work of breathing and/or tachypnea<br>Experienced coughing and/or choking          | F                     | Paused for resting                                       | F                          | Increased work of breathing and/or increased RR |
|                      |                                                                                                                                                                                                                      | G                     | Re-alerting due to fatigue                               | G                          | Loss of feeding cues                            |
|                      |                                                                                                                                                                                                                      | H                     | Other (specify)                                          | H                          | Other (specify)                                 |

## SUPPLEMENTAL FIGURE 5

Bedside cue-based feeding log depicting the prefeeding assessment, oral feeding assessment, feeding interventions, and reasons for feeding discontinuation.

|          |   | Pre-feeding Assessment |                           |                    | Oral Feeding Assessment           |                       |                      |  |
|----------|---|------------------------|---------------------------|--------------------|-----------------------------------|-----------------------|----------------------|--|
|          |   | <4L HFNC?              | Normal work of breathing? | Responsive to care | Suck-swallow-breathe coordination | Interventions applied | Feeding discontinued |  |
| THURSDAY | 1 |                        |                           |                    | Adequate                          | Fair                  | Weak                 |  |
|          | 2 |                        |                           |                    | Adequate                          | Fair                  | Weak                 |  |
|          | 3 |                        |                           |                    | Adequate                          | Fair                  | Weak                 |  |
|          | 4 |                        |                           |                    | Adequate                          | Fair                  | Weak                 |  |
|          | 5 |                        |                           |                    | Adequate                          | Fair                  | Weak                 |  |
|          | 6 |                        |                           |                    | Adequate                          | Fair                  | Weak                 |  |
|          | 7 |                        |                           |                    | Adequate                          | Fair                  | Weak                 |  |
|          | 8 |                        |                           |                    | Adequate                          | Fair                  | Weak                 |  |
| FRIDAY   | 1 |                        |                           |                    | Adequate                          | Fair                  | Weak                 |  |
|          | 2 |                        |                           |                    | Adequate                          | Fair                  | Weak                 |  |
|          | 3 |                        |                           |                    | Adequate                          | Fair                  | Weak                 |  |
|          | 4 |                        |                           |                    | Adequate                          | Fair                  | Weak                 |  |
|          | 5 |                        |                           |                    | Adequate                          | Fair                  | Weak                 |  |
|          | 6 |                        |                           |                    | Adequate                          | Fair                  | Weak                 |  |
|          | 7 |                        |                           |                    | Adequate                          | Fair                  | Weak                 |  |
|          | 8 |                        |                           |                    | Adequate                          | Fair                  | Weak                 |  |
| SATURDAY | 1 |                        |                           |                    | Adequate                          | Fair                  | Weak                 |  |
|          | 2 |                        |                           |                    | Adequate                          | Fair                  | Weak                 |  |
|          | 3 |                        |                           |                    | Adequate                          | Fair                  | Weak                 |  |
|          | 4 |                        |                           |                    | Adequate                          | Fair                  | Weak                 |  |
|          | 5 |                        |                           |                    | Adequate                          | Fair                  | Weak                 |  |
|          | 6 |                        |                           |                    | Adequate                          | Fair                  | Weak                 |  |
|          | 7 |                        |                           |                    | Adequate                          | Fair                  | Weak                 |  |
|          | 8 |                        |                           |                    | Adequate                          | Fair                  | Weak                 |  |
| SUNDAY   | 1 |                        |                           |                    | Adequate                          | Fair                  | Weak                 |  |
|          | 2 |                        |                           |                    | Adequate                          | Fair                  | Weak                 |  |
|          | 3 |                        |                           |                    | Adequate                          | Fair                  | Weak                 |  |
|          | 4 |                        |                           |                    | Adequate                          | Fair                  | Weak                 |  |
|          | 5 |                        |                           |                    | Adequate                          | Fair                  | Weak                 |  |
|          | 6 |                        |                           |                    | Adequate                          | Fair                  | Weak                 |  |
|          | 7 |                        |                           |                    | Adequate                          | Fair                  | Weak                 |  |
|          | 8 |                        |                           |                    | Adequate                          | Fair                  | Weak                 |  |

  

| Suck-Swallow-Breathe |                                                                                                                                                                                                        |                                                            |                                           |
|----------------------|--------------------------------------------------------------------------------------------------------------------------------------------------------------------------------------------------------|------------------------------------------------------------|-------------------------------------------|
| Adequate             | Engaged with rhythmical and coordinated sucking<br>No oral spill<br>No intervention required                                                                                                           | Feeding Interventions                                      | Discontinuation of Feeding                |
| Fair                 | Initially engaged but fatigues as feeding progresses<br>Difficulty coordinating swallow<br>Responded to pacing for oral spill<br>May benefit from rest breaks<br>Slight increase in WOB above baseline | A Elevated side-lying position                             | A Fatigue                                 |
|                      |                                                                                                                                                                                                        | B External pacing                                          | B Behavioral stress cues                  |
|                      |                                                                                                                                                                                                        | C Increased oxygen need during feeding                     | C Disengagement cues and/or avoidance     |
|                      |                                                                                                                                                                                                        | D Nipple change                                            | D Feeding exceeds 30 minutes              |
|                      |                                                                                                                                                                                                        | E Stimulation due to bradycardia(s) and/or desaturation(s) | E Frequent bradycardias and desaturations |
| Weak                 | Becomes disengaged related to stress cues<br>Experienced bradycardia(s) and/or desaturation(s)<br>Significant oral spill<br>Heavy WOB and/or tachypnea<br>Experienced coughing and/or choking          | F Paused for resting                                       | F Increased WOB and/or increased RR       |
|                      |                                                                                                                                                                                                        | G Re-alerting due to fatigue                               | G Loss of feeding cues                    |
|                      |                                                                                                                                                                                                        | H Other (specify)                                          | H Other (specify)                         |

**SUPPLEMENTAL FIGURE 5**  
Continued.

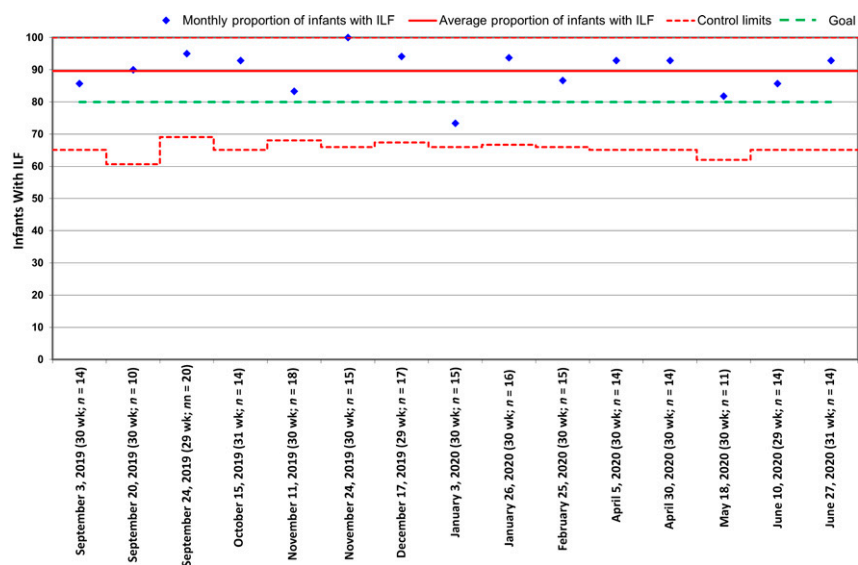

# **SUPPLEMENTAL FIGURE 6**

P-chart of cue-based feeding flowsheet compliance after implementation during PDSA 2. ILF, infant-led feeding.

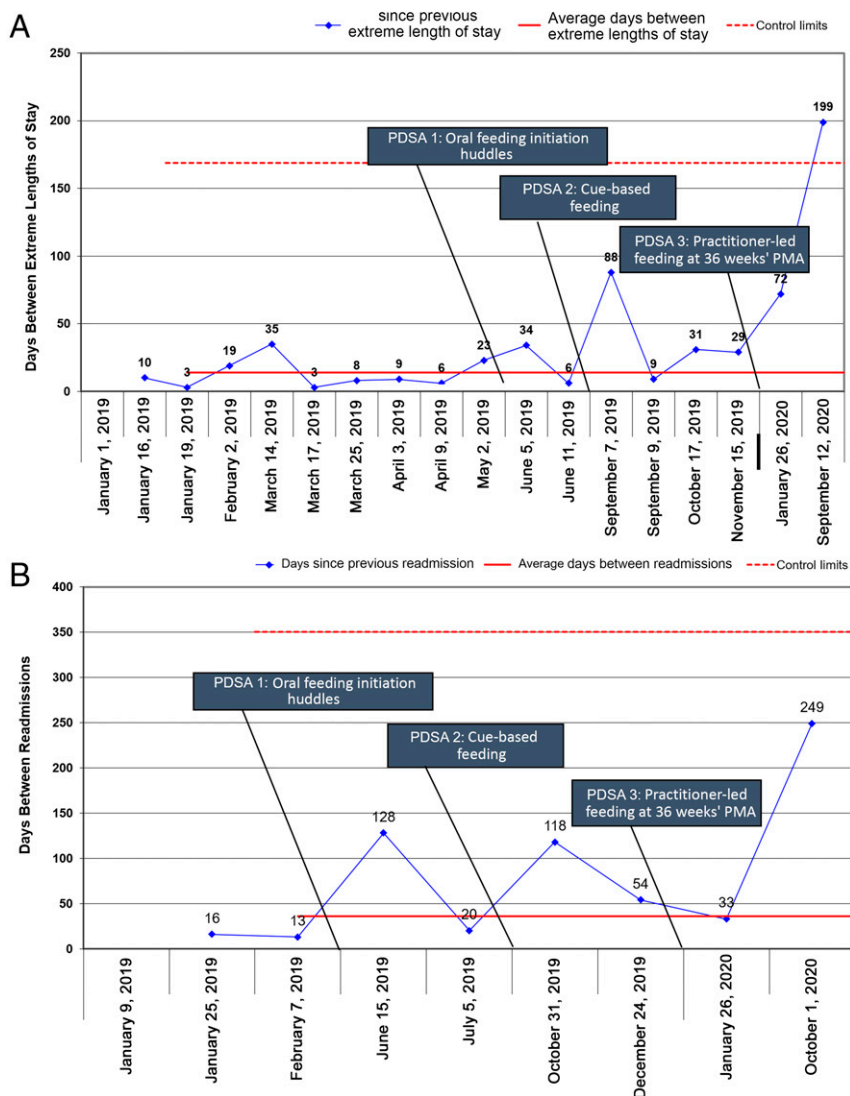

# **SUPPLEMENTAL FIGURE 7**

A, T-chart of extreme length of stay defined as continued hospitalization at  $\geq 48$  weeks' PMA. Days on which an infant was born with subsequent extreme length of stay are reported on the x-axis, with days between events noted above each data point. B, T-chart of all-cause readmissions for the duration of the initiative. Days on which an infant was born with subsequent readmission are reported in the x-axis, with days between events noted above each data point.

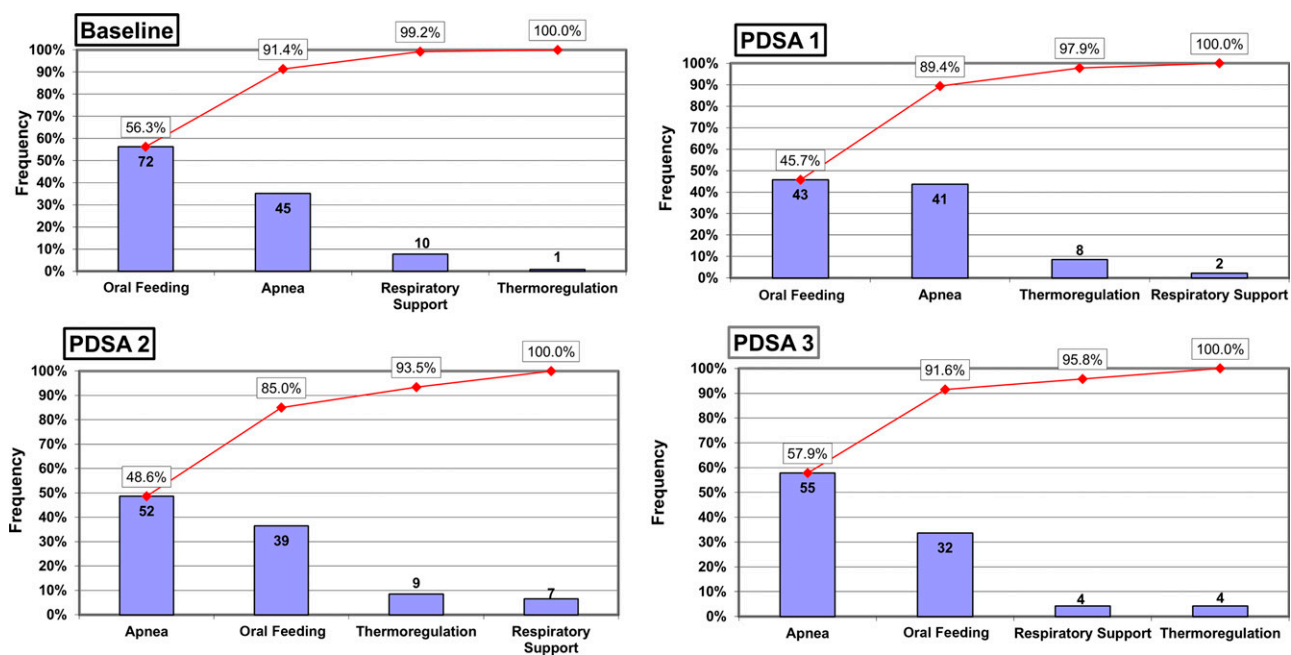

#### SUPPLEMENTAL FIGURE 8

Pareto charts for the top 4 terminal barriers to discharge by PDSA cycle.
